# Supplementary material
Source: publisher figshare collection journal article supplement (https://karger.figshare.com/ndownloader/files/21212109)
Supplement: Supplementary file 1 [file 21212109]

Supplementary Materials for:

*Effects of Skip-Logic on the Validity of Dimensional Clinical Scores: A Simulation Study*

Supplementary Figure 1: Bias Introduced by Skip-Logic (main effects).
